# Supplementary material
Source: publisher figshare collection journal article supplement (https://karger.figshare.com/ndownloader/files/23167328)
Supplement: Supplementary file 1 [file 23167328]

Supplement online 2: Angiographic and clinical outcomes by stent-retriever lengths (unmatched analysis)

|  | Unadjusted Analysis | | |
| --- | --- | --- | --- |
|  | Short  n= 321 | Long  n= 73 | P-Value |
| **Primary outcome** | | | |
| First-pass reperfusion | | | |
| mTICI 3 | 93 (29.9%) | 21 (28.8%) | 0.972 |
| mTICI ≥2b | 144 (44.9%) | 31 (42.5%) | 0.710 |
| **Secondary outcome** | | | |
| Final reperfusion | | | |
| mTICI ≥2b | 274 (85.4%) | 31 (42.5%) | <0.001 |
| mTICI 3 | 145 (45.2%) | 34 (46.6%) | 0.897 |
| Number of passes, mean ± SD | 2.7 ± 2.3 | 2.7 ± 2.2 | 0.685 |
| Groin puncture – reperfusion (minutes), mean ± SD | 67.4 ± 47.6 | 71.4 ± 51.5 | 0.695 |
| Subarachnoid hemorrhage | 26  (8.1%) | 7  (9.6%) | 0.678 |
| **Clinical Outcome** | | | |
| mRS score ≤ 2 at discharge | 85 (36.4%) | 8 (11.0%) | 0.005 |
| mRS score ≤ 2 at 90 days | 104/278  (37.4%) | 8/61  (13.1%) | 0.009 |

mRS: modified Rankin Scale; mTICI: modified thrombolysis in cerebral infarction; SD: standard deviation
